# Supplementary material
Source: Springer Nature journal article supplement (https://www.springermedizin.de/resource/supplementary/12939_2009_163_MOESM2_ESM.pdf/9551620)
Supplement: MOESM2 [file 9551620]

## Literature Search Strategy

## Literature Search Results

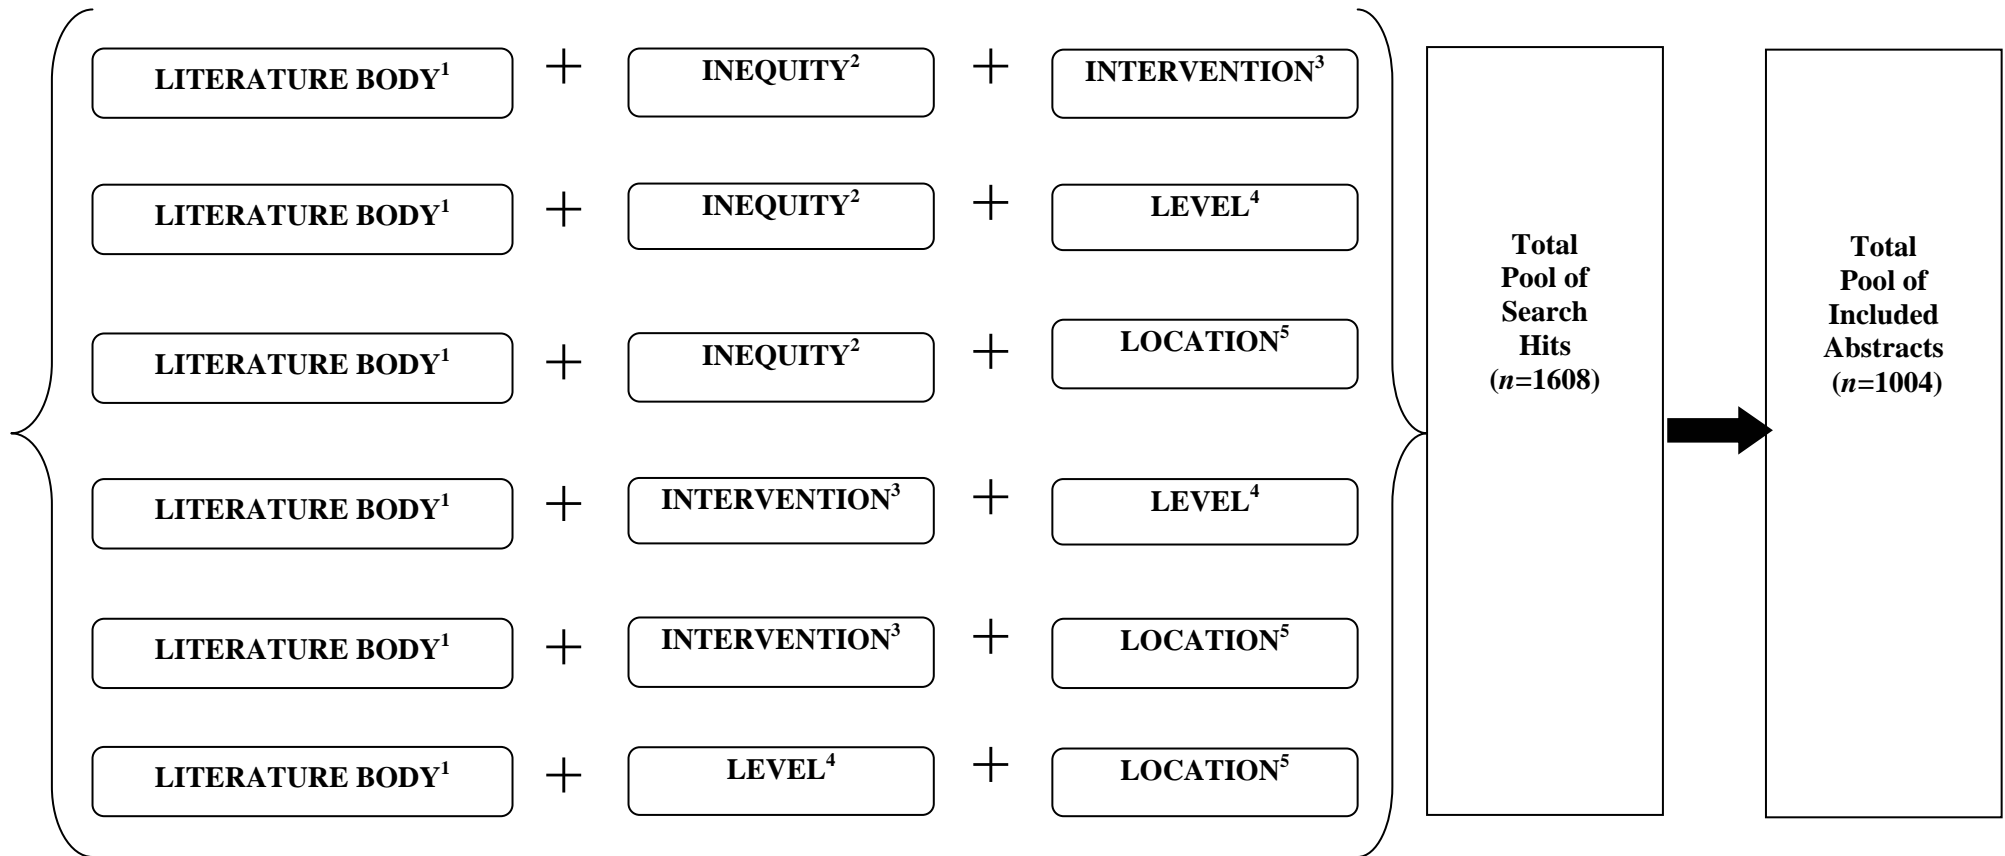

### Literature Search Terms

- 1 - LITERATURE BODY “Health Promotion”; [“Healthy Cities” OR “Healthy Communities”]; “Population Health”; “Urban Health”
- 2 - INEQUITY (inequality OR inequalities OR “health inequality” OR “health inequalities” OR inequity OR inequities OR “health inequity” OR “health inequities” OR disparity OR disparities OR “health disparity” OR “health disparities” OR determinants OR “health determinants”)
- 3 - INTERVENTION (policy OR plan OR planning OR program OR regulation OR legislation OR law OR legal OR intervention)
- 4 - LEVEL (municipal OR municipality OR municipalities OR “municipal government” OR “local government” OR “local state”)
- 5 - LOCATION (Canada OR “Nova Scotia” OR “Prince Edward Island” OR “New Brunswick” OR Newfoundland OR Quebec OR Ontario OR Manitoba OR Saskatchewan OR Alberta OR “British Columbia” OR Halifax OR Montreal OR Ottawa OR Toronto OR Hamilton OR Winnipeg OR Saskatoon OR Edmonton OR Calgary OR Vancouver)
